# Supplementary material
Source: MDPI journal article supplement (https://www.mdpi.com/2571-9408/6/3/150)
Supplement: s1 [file s1]

## Supplementary

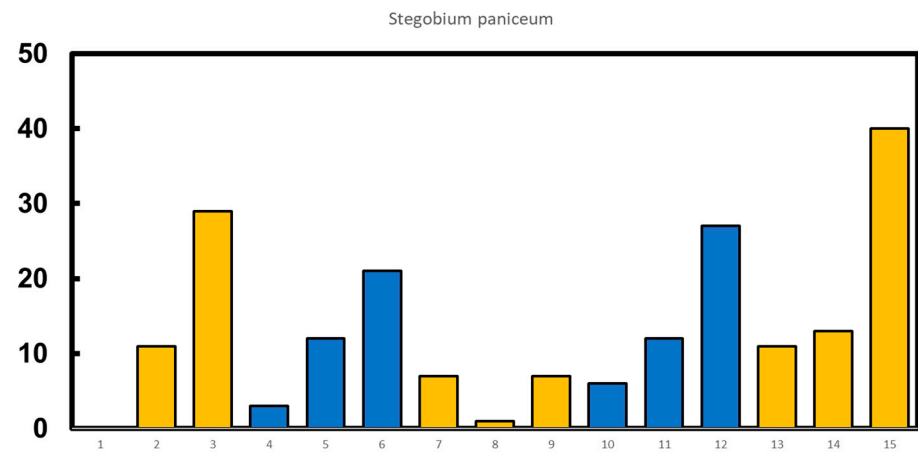

**Figure S1.** *Stegobium paniceum* catch from all the museums for the triannual samples 2018–2022.
